# 1 Structural basis of *Toxoplasma gondii* Perforin-Like Protein

## 2 1 membrane interaction and activity during egress

3 Alfredo J. Guerra<sup>a</sup>, Ou Zhang<sup>a</sup>, Constance M. E. Bahr<sup>a</sup>, My-Hang Huynh<sup>a</sup>, James DelProposto<sup>b</sup>, William C.  
4 Brown<sup>b</sup>, Zdzislaw Wawrzak<sup>c</sup>, Nicole M. Koropatkin<sup>a</sup>, Vern B. Carruthers<sup>a,1</sup>

5  
6 <sup>a</sup> Department of Microbiology and Immunology, University of Michigan, Ann Arbor, MI 48109

7 <sup>b</sup> Life Sciences Institute, University of Michigan, Ann Arbor, MI 48109

8 <sup>c</sup> LS-CAT, Synchrotron Research Center, Northwestern University, Argonne, IL 60439

9 <sup>1</sup> Correspondence: galfredo@umich.edu; Tel.: 1-734-763-2093

### 10 **Abstract**

11 Intracellular pathogens must egress from the host cell to continue their infectious cycle.  
12 Apicomplexans are a phylum of intracellular protozoans that have evolved members of the  
13 membrane attack complex and perforin (MACPF) family of pore forming proteins to disrupt  
14 cellular membranes for traversing cells during tissue migration or egress from a replicative  
15 vacuole following intracellular reproduction. Previous work showed that the apicomplexan  
16 *Toxoplasma gondii* secretes a perforin-like protein (*Tg*PLP1) that contains a C-terminal Domain  
17 (CTD) which is necessary for efficient parasite egress. However, the structural basis for CTD  
18 membrane binding and egress competency remained unknown. Here, we present evidence that  
19 *Tg*PLP1 CTD prefers binding lipids that are abundant in the inner leaflet of the lipid bilayer.  
20 Additionally, solving the high-resolution crystal structure of the *Tg*PLP1 APC $\beta$  domain within  
21 the CTD reveals an unusual double-layered  $\beta$ -prism fold that resembles only one other protein of  
22 known structure. Three direct repeat sequences comprise subdomains, with each constituting a  
23 wall of the  $\beta$ -prism fold. One subdomain features a protruding hydrophobic loop with an  
24 exposed tryptophan at its tip. Spectrophotometric measurements of intrinsic tryptophan  
25 fluorescence are consistent with insertion of the hydrophobic loop into a target membrane. Using  
26 CRISPR/Cas9 gene editing we show that parasite strains bearing mutations in the hydrophobic  
27 loop, including alanine substitution of the tip tryptophan, are equally deficient in egress as a  
28 strain lacking *Tg*PLP1 altogether. Taken together our findings suggest a crucial role for the

29 hydrophobic loop in anchoring *Tg*PLP1 to the membrane to support its cytolytic activity and  
30 egress function.

### 31 **Author Summary**

32 *Toxoplasma gondii* has a complex life cycle that involves active invasion of the host cell, the  
33 formation of a replicative compartment, and egress from the replicative niche. *T. gondii* encodes  
34 a pore-forming protein, *Tg*PLP1, that contains a C-terminal domain that is crucial for efficient  
35 exit from both the parasite containing vacuole and the host cell. However, the mechanism by  
36 which *Tg*PLP1 recognizes and binds to the appropriate membrane is unclear. Here we use a  
37 combination of biochemistry, structural biology, and parasitology to identify the a preference of  
38 *Tg*PLP1 for specific lipids and show that a loop within the structure of the C-terminal domain  
39 inserts into the membrane and is necessary for egress from the parasite containing vacuole. Our  
40 study sheds light into the determinants of membrane binding in *Tg*PLP1 which may inform the  
41 overall mechanism of pore formation in similar systems

### 42 **Introduction**

43 Cellular egress from the host is a crucial step in the infectious cycle of intracellular  
44 pathogens. Accordingly, such pathogens have evolved multiple exit strategies, which can be  
45 divided into those that leave the host cell intact and those that rupture the host cell. Several  
46 bacterial pathogens, including *L. monocytogenes*, use an actin-based protrusion mechanism that  
47 allows a bacterium to enter a neighboring host cell without damaging the original host cell. <sup>[1]</sup>  
48 Other bacteria have developed extrusion or expulsion mechanisms that also leave the host cell  
49 intact. <sup>[2-5]</sup> Also, pyroptotic and apoptotic mechanisms leverage cell-death signaling as a means  
50 for intracellular pathogens to exit the host cell. <sup>[6]</sup> Many apicomplexan parasites, including  
51 *Toxoplasma gondii*, use a cytolytic mechanism of egress that obliterates the infected cell.  
52 Cytolytic egress results in direct tissue destruction and indirect collateral damage from the  
53 ensuing inflammatory response, a hallmark of acute infection by apicomplexan parasites and a  
54 key aspect of disease. <sup>[7]</sup>

55 The apicomplexan phylum encompasses a variety of parasitic genera important to both  
56 human and veterinary health including *Plasmodium*, *Cryptosporidium*, *Eimeria*, and  
57 *Toxoplasma*.<sup>[8-11]</sup> These parasites contain a unique set of apical secretory organelles, micronemes  
58 and rhoptries, which discharge proteins involved in parasite motility, host cell manipulation, and

59 egress.<sup>[12-15]</sup> *T. gondii* is capable of infecting and replicating asexually within virtually any  
60 nucleated cell during the acute stage of infection. Its “lytic cycle” can generally be divided into  
61 three steps: invasion where the parasite containing vacuole (parasitophorous vacuole, PV) is  
62 formed, intracellular replication, and finally egress from the vacuole. Whereas invasion and  
63 intracellular replication have garnered considerable attention, egress remains the least understood  
64 component of the lytic cycle.

65 Efficient egress by *T. gondii* critically relies on micronemal secretion of *TgPLP1*, a  
66 member of the membrane attack complex/perforin (MACPF) protein family <sup>[15]</sup>. MACPF  
67 proteins play central roles in immunity (e.g., perforins and complement proteins), embryonic  
68 development (*Drosophila* torso-like and mammalian astrotactins), fungal predation (Oyster  
69 mushroom pleurotolysins A/B), and cell traversal or egress by apicomplexan parasites. The  
70 domain arrangement for *TgPLP1* includes a central MACPF domain that is flanked by an N-  
71 terminal domain (NTD) and a C-terminal domain (CTD). Both the NTD and CTD have  
72 membrane-binding activity, but only CTD is crucial for proper *TgPLP1* function.<sup>[16]</sup> Although  
73 structural insight into the *TgPLP1* apicomplexan perforin  $\beta$ -domain (APC $\beta$ ), which comprises a  
74 portion of the CTD, was reported recently,<sup>[17]</sup> how structural features of this domain contribute to  
75 the function of *TgPLP1* in egress has not been addressed.

76 Overall, the mechanism of MACPF proteins begins with membrane recognition by the  
77 CTD.<sup>[18]</sup> Following membrane binding, MACPF proteins oligomerize into ring or arc shaped  
78 complexes and undergo a marked structural rearrangement of the MACPF domain where the so-  
79 called CH1 and CH2 helices unfurl and become extensions of the central  $\beta$ -sheets to create a  
80 large pore.<sup>[19]</sup> Previous work has shown that *TgPLP1* and other apicomplexans share this general  
81 mechanism of pore formation. However, the molecular determinants of membrane recognition  
82 and binding remain poorly understood. Here, we present evidence that *TgPLP1* has a strong  
83 preference for inner leaflet lipids and that binding to such membranes occurs via the CTD.  
84 Additionally, we solved the 1.13 Å resolution X-ray crystal structure of the *TgPLP1* APC $\beta$   
85 domain and identified a hydrophobic loop that likely inserts into the target membrane. Finally,  
86 we use CRISPR/CAS9 to insert mutations into the hydrophobic loop and show that it is critical  
87 for egress competence.

## 88 **Results**

### 89 ***PLP1 preferentially binds inner leaflet lipids***

90 Previous work has identified PLP1 as an important egress factor that can bind membranes  
 91 through its N-terminal domain (NTD) and C-terminal domain (CTD); however, only the CTD  
 92 has been shown to be required for lytic activity.<sup>[16]</sup> In the canonical pore forming mechanism,  
 93 MACPF/CDC proteins bind to the target membrane via the CTD as a first step. Membrane  
 94 interactions occur via specific protein <sup>[20-22]</sup> or lipid <sup>[23-26]</sup> receptors in the target membrane. To  
 95 test if *Tg*PLP1 is capable of binding lipid receptors, we generated liposomes that mimic the outer  
 96 leaflet (OL) or inner leaflet (IL) of the plasma membrane and tested the binding of both native  
 97 *Tg*PLP1 and a series of recombinant His-tagged constructs of *Tg*PLP1 (**Figure 1A**) via  
 98 membrane flotation. Native and recombinant full length *Tg*PLP1 (*rTg*PLP1) both showed a

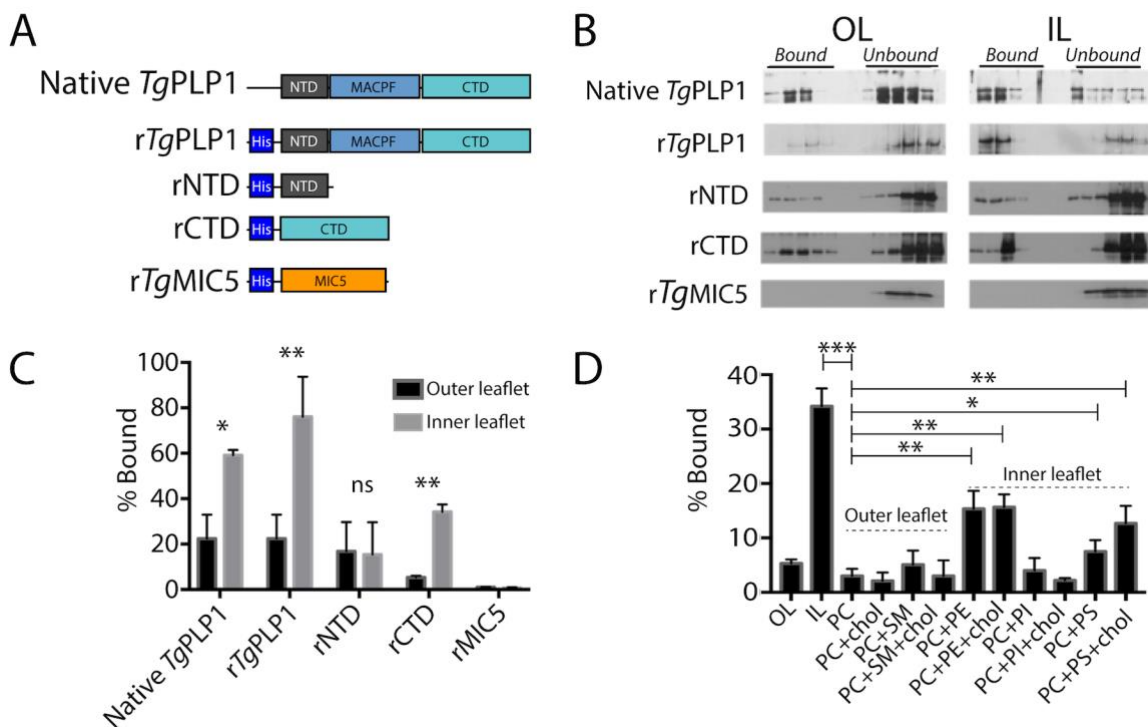

**Figure 1. *T. gondii* PLP1 CTD prefers inner leaflet phospholipids.** A. Schematic representation of the protein constructs used to test lipid binding. N-terminal, pore-forming, and C-terminal domains (NTD, MACPF, and CTD, respectively) are labeled for clarity. Micronemal protein *rTg*MIC5 was included as a negative control. B. Representative western blots from membrane flotation assay. After ultracentrifugation aliquots were taken starting at the top of the ultracentrifuge tube. Material contained in the top half of the tube is considered bound to the liposomes while material contained in the bottom portion of the tube is considered unbound. Outer leaflet mimic lipid composition (OL) was as follows: 75% PC, 8.3% SM, 16.7% cholesterol; Inner leaflet mimic lipid composition (IL) was: 35.7% PE, 14.3% PS, 21.4% PI, 28.6% cholesterol. C. Quantification of western blots shown in panel B. Statistical significance determined by paired t-test of three biological replicates. D. Quantification of *Tg*PLP1<sub>CTD</sub> binding to liposomes of varying composition. Statistical significance determined by unpaired Student's t-test of three biological replicates.

99 striking preference for IL liposomes (**Figure 1B & C**). Recombinant *Tg*PLP1 CTD (rCTD) also  
100 showed a preference for IL liposomes whereas the recombinant NTD (rNTD) bound equally to  
101 IL and OL liposomes (**Figure 1B & C**). As a control, we included an unrelated His-tagged  
102 recombinant micronemal protein (r*Tg*MIC5), which failed to bind liposomes.

103 Since rCTD appears to bind preferentially to liposomes that mimic the IL of the plasma  
104 membrane we tested if rCTD prefers binding liposomes composed of individual lipids or  
105 combinations thereof. Consistent with our previous observation, rCTD does not bind to  
106 liposomes comprised of OL phospholipids, namely phosphatidylcholine (PC) and sphingomyelin  
107 (SM), in the presence and absence of cholesterol (**Figure 1D & Figure S1**). Consistent with its  
108 preference for certain IL lipids, rCTD bound to liposomes composed of  
109 phosphatidylethanolamine (PE) or phosphatidylserine (PS), but not phosphatidylinositol (PI)  
110 (**Figure 1D**). However, none of the liposomes prepared with individual IL liposomes fully  
111 recapitulate the binding to IL mimic liposomes. Together these findings suggest that the  
112 preference of *Tg*PLP1 for IL lipids is conferred by its CTD and involves amalgamated binding to  
113 PS and PE.

#### 114 *The TgPLP1 APC $\beta$ domain contains a hydrophobic loop that likely inserts into membranes*

115 *Tg*PLP1 contains a well-conserved central MACPF domain that is flanked by a poorly  
116 conserved NTD and CTD (**Figure 2A**). The CTD includes the apicomplexan specific APC $\beta$   
117 domain, which consists of 3 direct repeats with 4 highly conserved cysteines in each repeat and a  
118 C-terminal tail (CTT) that includes a basic patch. To better understand the molecular  
119 determinants that govern membrane binding and lipid specificity in this system we expressed,  
120 purified, and crystallized the *T. gondii* PLP1 CTD. Despite using a construct that encompassed  
121 the entire CTD, the resulting crystals contained only the APC $\beta$  domain. Whether this  
122 discrepancy is due to a lack of electron density or enzymatic cleavage of the CTT remains  
123 unclear.

124 The *Tg*PLP1 APC $\beta$  domain crystallized in the C<sub>121</sub> space group with two monomers in  
125 the asymmetric unit. The structure was solved using iodine soaks and single-wavelength  
126 anomalous dispersion and subsequently refined to 1.13 Å resolution. The crystallographic data  
127 and refinement statistics are summarized in **Table 1**. The *Tg*PLP1 APC $\beta$  structure shows that the  
128  $\beta$ -rich repeat region is comprised of a single globular domain with internal pseudo threefold

129 symmetry wherein each  $\beta$ -rich repeat forms a subdomain (**Figure 2B & C**). Each of the three  
130 subdomains contains an internal antiparallel  $\beta$ -sheet and an outer  $\beta$ -hairpin (**Figure S2A & B**).  
131 The inner and outer layers of each subdomain are held together, in part, by two disulfide bonds  
132 between the highly conserved cysteines. An overlay of the three subdomains highlights the  
133 similarity in the core of each subdomain. Indeed subdomains 1 and 2 (**Figure S2C** red and  
134 green) overlay with an RMSD of 0.728 Å. Subdomain 3 (**Figure S2C** blue), however, aligns less  
135 well with subdomain 1 (RMSD 3.207 Å) and subdomain 2 (RMSD 3.175 Å), with the majority  
136 of the alignment differences attributed to two loops that protrude from the “bottom” of  
137 subdomain 3. The longer of the two loops has hydrophobic character, and thus is termed the  
138 hydrophobic loop (**Figure 2B**, colored cyan), whereas the shorter of the two loops has basic  
139 character, termed the basic loop (**Figure 2B**, colored orange).

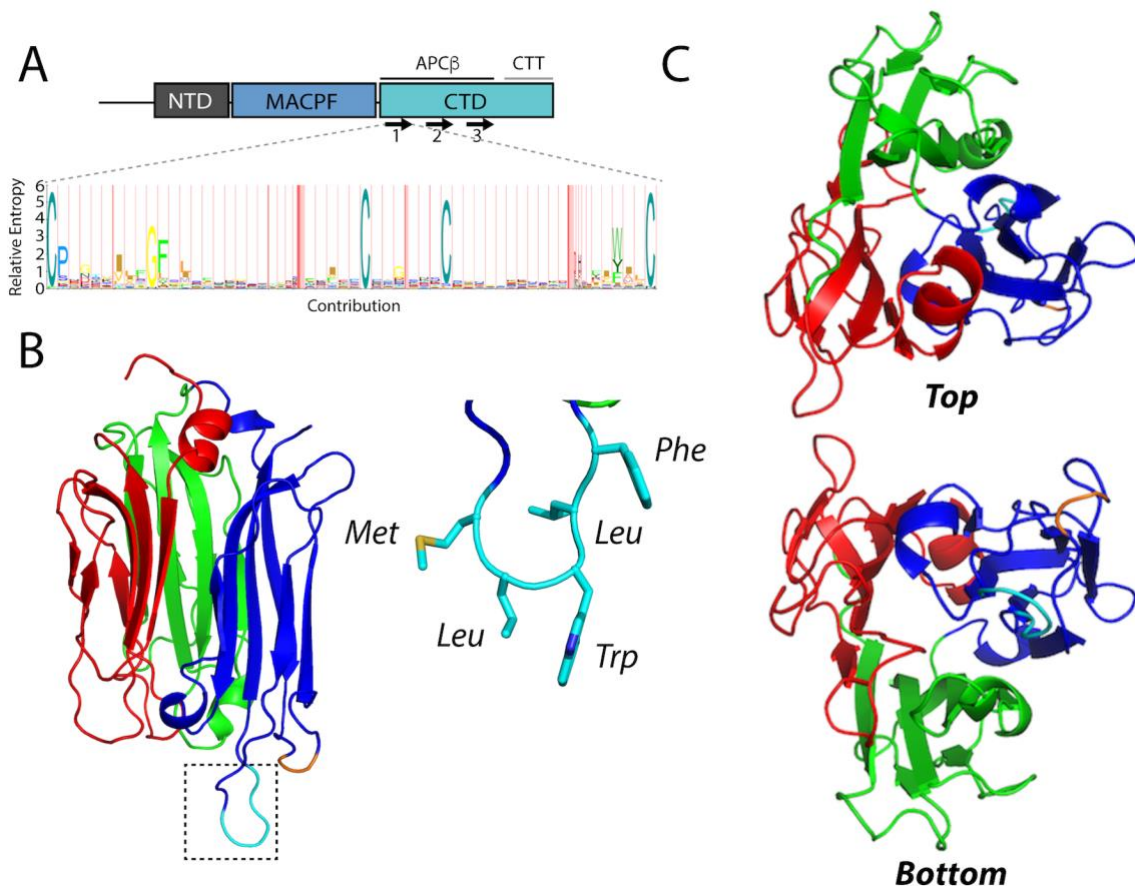

**Figure 2. The 1.13 Å resolution crystal structure of the *TgPLP1* APC $\beta$  domain.** A. Schematic representation of the three domains in *TgPLP1*. The CTD contains a three  $\beta$ -rich sequences (denoted by arrows) and a C-terminal tail (CTT). A Hidden Markov Model consensus display of the  $\beta$ -rich repeat sequences from 51 apicomplexan CTD sequences. B. 1.13 Å resolution crystal structure of the APC $\beta$  domain. The crystal structure is made up of three subdomains (red, green, and blue) and contains a basic loop (orange) and a hydrophobic loop (cyan, inset) that protrude from the bottom of one subdomain. C. Top and bottom view of the *TgPLP1* APC $\beta$  domain highlights the internal pseudo threefold symmetry.

140 To determine commonality of double-layered  $\beta$ -prism fold we searched for proteins with  
 141 structural similarity to the APC $\beta$  using the Dali server. [27] The Dali server measures similarity  
 142 by a sum-of-pairs method that outputs a Dali-Z score. Structures with a Dali-Z score above 2 are  
 143 considered to have structural similarity. With the exception of a recently published structure of a  
 144 similar *Tg*PLP1 APC $\beta$  construct (Dali-Z score 48.5), [17] the top scoring result from the Dali  
 145 server for the *Tg*PLP1<sub>APC $\beta$</sub>  structure is the C-terminal domain of human proprotein convertase  
 146 subtilisin/kexin type 9 (PCSK9 V-domain, Dali-Z score 6.0; **Table S1**). Indeed, this domain  
 147 contains similar internal pseudo threefold symmetry and is a double-layered  $\beta$ -prism fold with

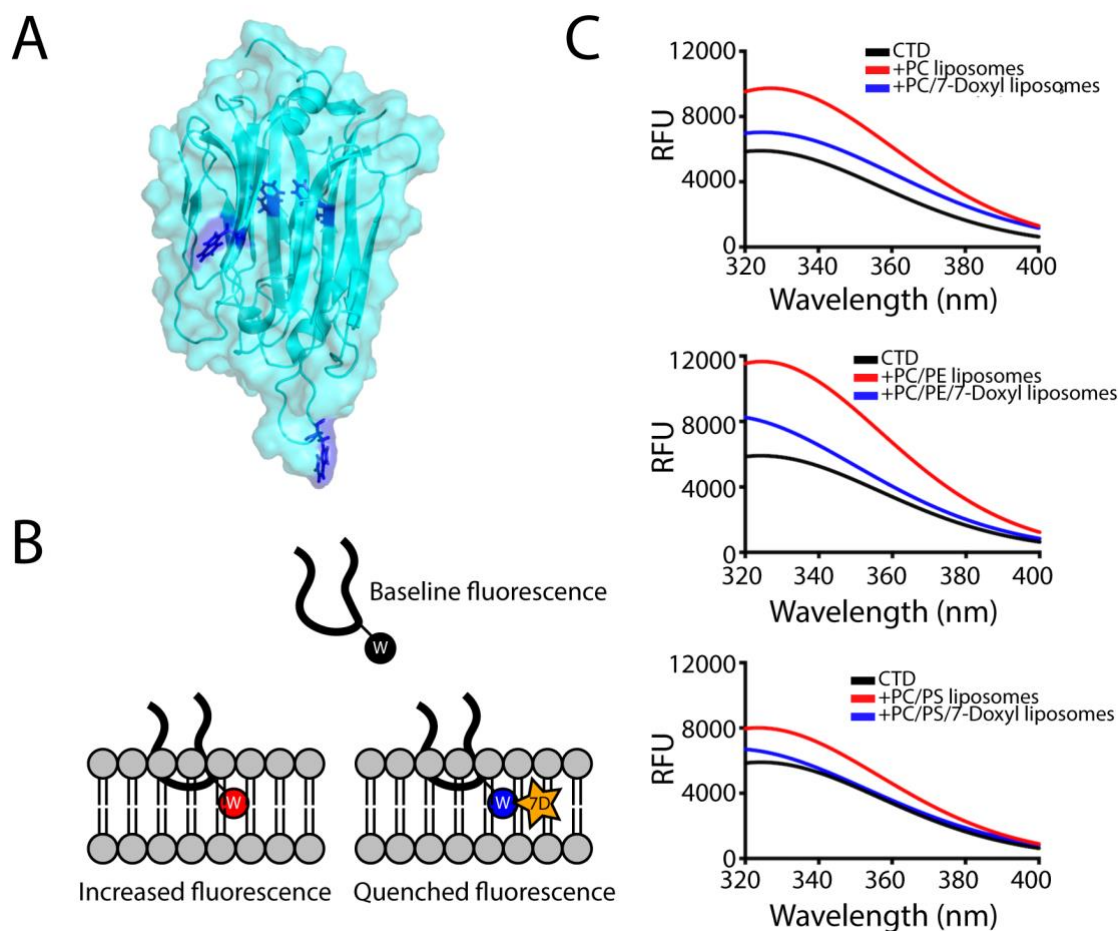

**Figure 3. Intrinsic tryptophan fluorescence spectra are indicative of insertion of tryptophan into liposomes.** A. Location of the tryptophan side chains in the *Tg*PLP1<sub>APC $\beta$</sub>  structure. Only two tryptophan residues are exposed at the surface of *Tg*PLP1<sub>APC $\beta$</sub> . B. Cartoon schematic of the hydrophobic loop inserting into a lipid bilayer. In the tryptophan fluorescence experiment the intrinsic fluorescence of the tryptophan sidechain increases when moving from an aqueous environment to a more hydrophobic environment in the lipid bilayer. Liposomes were also prepared replacing 10% of the PC lipids with a PC lipid conjugated to a collisional quencher (7-Doxyl, 7D). This results in a quenching of the fluorescence. C. Intrinsic tryptophan fluorescence emission spectra of *Tg*PLP1<sub>CTD</sub> in the absence (black curves) or presence of PC, PC/PE, or PC/PS liposomes (red curves). In each case the fluorescence emission increases in the presence of liposomes. The increase is less pronounced in the presence of 7-Doxyl (blue curves). Curves are from the averages of three biological replicates each with 3 technical replicates. Liposome composition as follows: PC: 100% PC; PC/7-Doxyl: 90%PC, 10% 7-Doxyl; PC/PE: 50% PC, 50% PE; PC/PE/7-Doxyl: 40% PC, 50% PE, 10% 7-Doxyl; PC/PS: 50% PC, 50% PS; PC/PS/7-Doxyl: 40% PC, 50% PE, 10% 7-Doxyl.

148 disulfide bonds that link the inner and outer layers. However, the number of outer layer  $\beta$ -sheets  
149 is variable within the domain (**Figure S3**). Despite the similarities in the overall fold the APC $\beta$   
150 structure has very poor structural alignment with the PCSK9 V-domain (RMSD 15.706 Å).  
151 These findings suggest that APC $\beta$  adopts an uncommon variation of the  $\beta$ -prism fold, which,  
152 together with the PCSK9 V-domain, constitutes a new subgroup of the  $\beta$ -prism family.

153         Given the hydrophobic character of the loop at the bottom of the APC $\beta$  structure we  
154 reasoned that this loop has the potential to insert into the membrane upon binding. To test this,  
155 we took advantage of the intrinsic fluorescence of tryptophan, which is augmented upon  
156 exposure to a hydrophobic environment. The TgPLP1 CTD houses four tryptophan residues of  
157 which only two are surface exposed (**Figure 3A**). We recorded the tryptophan fluorescence  
158 spectrum of purified rCTD in the presence or absence of liposomes of varying compositions.  
159 Incubation with liposomes resulted in an increase in the emission spectrum. Replacement of 10%  
160 of PC lipids with PC lipids modified with 1-palmitoyl-2-stearoyl-(7-doxy)-sn-glycero-3-  
161 phosphocholine (7-Doxy), a collisional quencher, attenuated the increased fluorescence (**Figure**  
162 **3B & C**). These observations are consistent with insertion of the hydrophobic loop into the lipid  
163 bilayer.

#### 164 *Integrity of the hydrophobic loop is necessary for parasite egress*

165         We next investigated the importance of the hydrophobic loop in TgPLP1 function. We  
166 used CRISPR/CAS9 gene editing to generate mutant parasites expressing TgPLP1 with a loop  
167 that is symmetrically shortened by two or four amino acids (PLP1<sub>MWF</sub> and PLP1<sub>w</sub>, respectively)  
168 as well as a mutant lacking the loop entirely (PLP1 $\Delta$ <sub>loop</sub>) (**Figure 4A**). Immunofluorescence  
169 microscopy confirmed the micronemal sub-cellular localization of the hydrophobic loop deletion  
170 mutants (**Figure S4**). Additionally, all three loop mutants are secreted in a calcium-dependent  
171 manner as evidenced by excreted/secreted antigen (ESA) assays conducted in the presence or  
172 absence of the calcium chelator BAPTA-AM (**Figure 4B**).

173         Next, we tested the egress competence of these loop deletion mutants using four general  
174 criteria that have been seen in the TgPLP1 knockout strain ( $\Delta$ *plp1*): (1) the presence of spherical  
175 structures in egressed cultures representing failed egress events; (2) formation of smaller plaques  
176 relative to wild type parasites; (3) inability to permeabilize the PV membrane (PVM) after  
177 calcium ionophore induction; and (4) delayed egress after calcium ionophore induction.



178 Spherical structures were observed in egressed cultures of PLP1<sup>w</sup>, PLP1<sup>MWF</sup>, and PLP1<sup>Δloop</sup>  
 179 similar with those seen in *Δplp1* (Figure 5A). PLP1<sup>w</sup>, PLP1<sup>MWF</sup>, and PLP1<sup>Δloop</sup> parasites form  
 180 smaller plaques compared to the parental (WT) strain, consistent to those observed for *Δplp1*  
 181 (Figure 5B & C). Previous studies have shown that *Δplp1* parasites immobilized with  
 182 cytochalasin D treatment fail to permeabilize the PVM after induced egress with a calcium  
 183 ionophore as compared to WT parasites. We therefore tested the ability of the hydrophobic loop  
 184 deletion strains to permeabilize the PVM under the same conditions. PLP1<sup>w</sup>, PLP1<sup>MWF</sup>, and

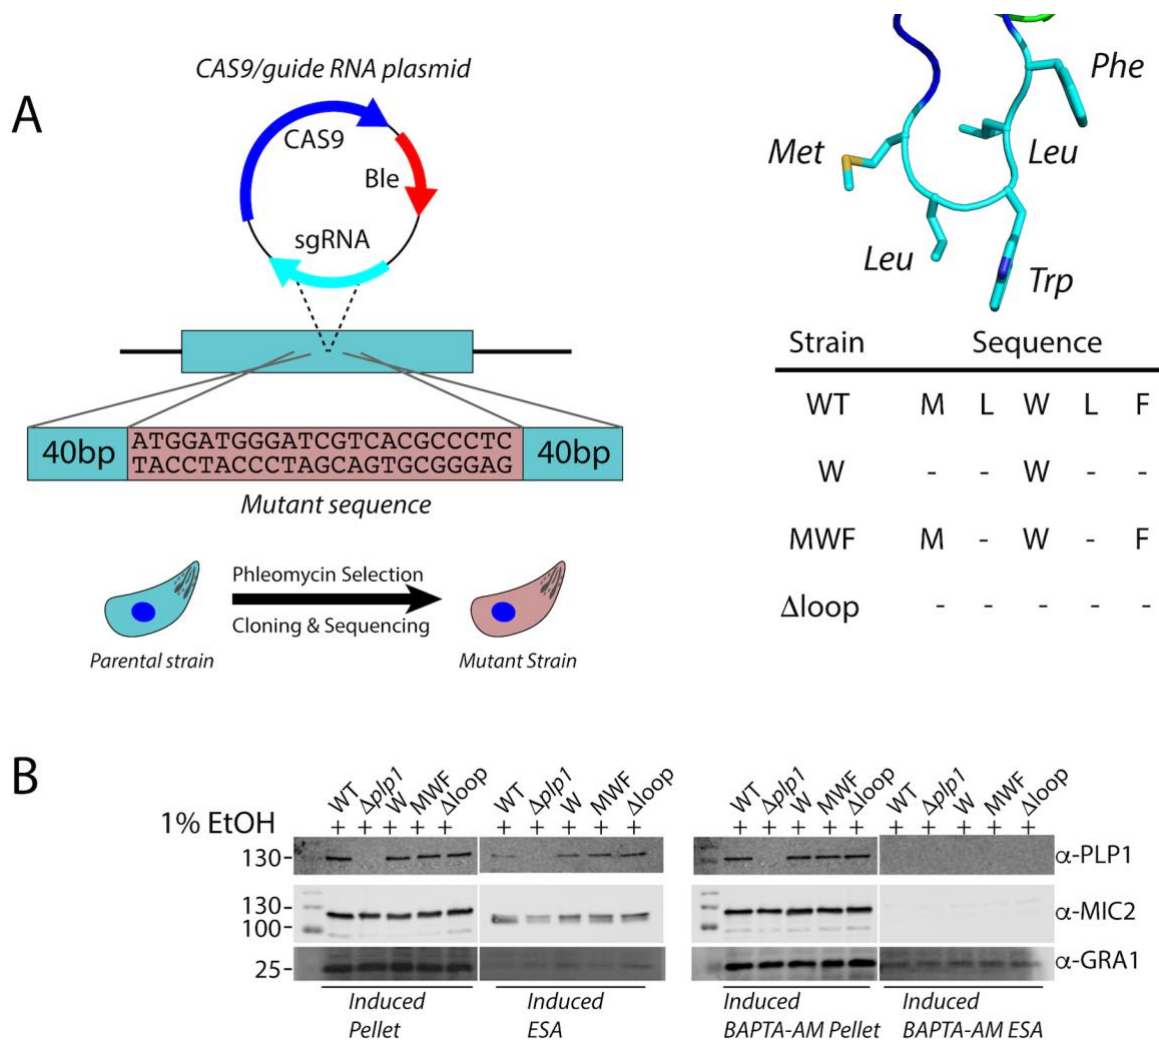

**Figure 4. Generation of amino acid deletion mutants in the PLP1 hydrophobic loop** A. Schematic representation of the implementation of CRISPR/CAS9 to generate the mutant strains in this study. A sgRNA was used to generate a double stranded break at the hydrophobic loop and a repair template that encoded the appropriate mutation was supplied. The wild type sequence (MLWLF) was truncated to generate shorter loops with the sequences shown on the right. B. Representative western blot of an ESA assay of amino acid deletions in the hydrophobic loop of *TgPLP1*, strains are labeled with remaining amino acid sequence as above. Pellet fractions are comprised of parasites recovered after induction. ESA fractions include soluble proteins that have been secreted by the parasites. All strains secrete PLP1 in a calcium dependent manner after induction with 1% ethanol. MIC2 and GRA1 serve as loading controls.

185 PLP1 $\Delta$ loop parasites all fail to permeabilize the PVM after the addition of 200  $\mu$ M zaprinast, a  
 186 phosphodiesterase inhibitor that activates the parasite protein kinase G to induce egress,  
 187 consistent with what is observed for  $\Delta$ *plp1* parasites (**Figure 5D**). Finally, we monitored the  
 188 extent to which deletions to the hydrophobic loop affect egress from the host cell. To address  
 189 this, we infected HFF monolayers in a 96-well plate with WT,  $\Delta$ *plp1*, and each of the loop  
 190 mutants. Thirty hours post-infection the infected monolayers were treated with zaprinast to  
 191 induce egress. Culture supernatants were assayed for lactate dehydrogenase (LDH), which is  
 192 released from infected host cells upon parasite egress.  $\Delta$ *plp1*, PLP1<sub>w</sub>, PLP1<sub>MWF</sub>, and PLP1 $\Delta$ loop  
 193 showed a marked decrease in LDH release compared to cells infected with WT parasites (**Figure**  
 194 **5E**). These data suggest that integrity of the hydrophobic loop is critical for *Tg*PLP1 function.

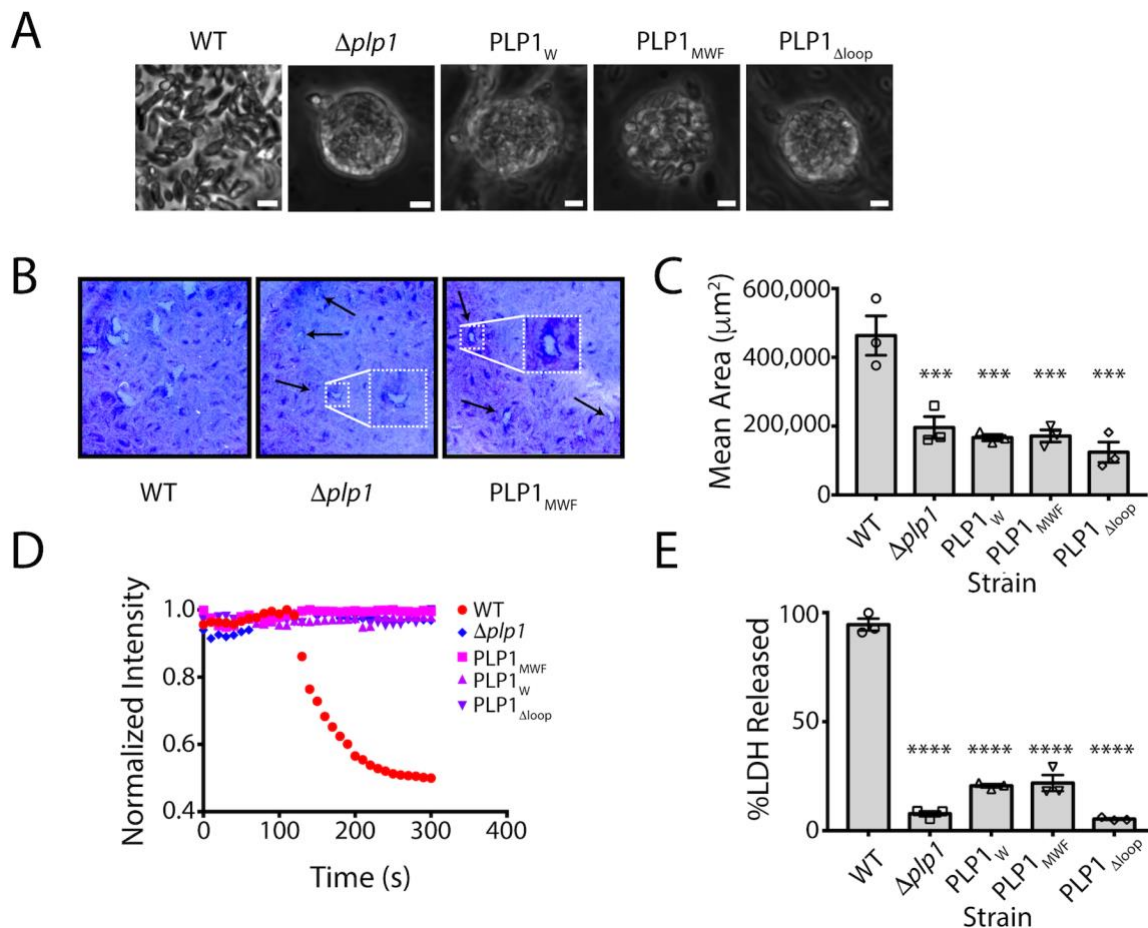

**Figure 5. Shortening of the hydrophobic loop mimics the egress phenotype of the *plp1* knockout strain.** A. Phase contrast images of parasite cultures. Scale bar, 5  $\mu$ m. B. Representative images from one of three biological replicate plaque assays for WT,  $\Delta$ *plp1*, and hydrophobic loop amino acid deletion mutants C. Quantification of plaque area. Statistical significance determined by one-way ANOVA with Dunnett correction of three biological replicates. D. Fluorescence intensity tracings of DsRed escape from the PV. Infected monolayers were treated with 1  $\mu$ M cytochalasin D and 200  $\mu$ M zaprinast and observed by fluorescence microscopy. E. Egress of wild type and mutant parasites as measured by LDH release upon addition of 200  $\mu$ M zaprinast and incubation for 20 min. Statistical significance determined by one-way ANOVA with Dunnett correction of three biological replicates.

195 ***Amino acid identity in the hydrophobic loop is important for TgPLP1 function in egress***

196 Since shortening the hydrophobic loop resulted in an egress defect that mimics  $\Delta plp1$   
197 parasites, we tested how the amino acid composition of the loop influences function. We again  
198 used CRISPR/CAS9 to generate four mutant strains including a leucine to valine substitution  
199 (PLP1<sub>MLWVF</sub>) as well as three alanine substitution mutants (PLP1<sub>MAAAF</sub>, PLP1<sub>MAWAF</sub>, and  
200 PLP1<sub>MLALF</sub>) to probe the importance of the leucine and tryptophan residues in the hydrophobic  
201 loop. We then tested the subcellular localization of these constructs by immunofluorescence  
202 microscopy and confirmed that all mutant strains have micronemal localization of TgPLP1  
203 (**Figure S5**). Additionally, all four mutants showed calcium-dependent secretion (**Figure 6A**).  
204 Next, we tested the egress competence of these mutant strains using the same criteria described  
205 above. Whereas the most conservative mutant (PLP1<sub>MLWVF</sub>) was not retained within spherical  
206 structures, all of the alanine substitution mutants (PLP1<sub>MLALF</sub>, PLP1<sub>MAWAF</sub>, and PLP1<sub>MAAAF</sub>)  
207 were entrapped in such structures, consistent with defective egress (**Figure 6B**). Next, we  
208 analyzed the plaque size of the mutants. PLP1<sub>MLWVF</sub> formed large plaques similar to those of WT  
209 parasites (**Figure 6C**). PLP1<sub>MLALF</sub>, PLP1<sub>MAWAF</sub>, and PLP1<sub>MAAAF</sub> parasites, however, formed  
210 small plaques akin to  $\Delta plp1$  (**Figure 6C & D**). In PVM permeabilization assays, PLP1<sub>MLWVF</sub> WAS  
211 the only mutant that retained activity after induction with zaprinast. Neither PLP1<sub>MLALF</sub>,  
212 PLP1<sub>MAWAF</sub>, nor PLP1<sub>MAAAF</sub> parasites permeabilize the PVM after induction, thus resembling the  
213 defect observed in  $\Delta plp1$ , PLP1<sub>W</sub>, PLP1<sub>MWF</sub>, PLP1 <sub>$\Delta$ loop</sub> strains (**Figure 6E**). Finally, we tested  
214 the extent to which amino acid substitutions to the hydrophobic loop affect egress from the host  
215 cell using the LDH assay described above. Consistent with the above findings, PLP1<sub>MLWVF</sub> is the  
216 only point mutant that retained the ability to egress from host cells. PLP1<sub>MLALF</sub>, PLP1<sub>MAWAF</sub>,  
217 PLP1<sub>MAAAF</sub> failed to egress in the duration of the experiment (**Figure 6F**). Taken together these  
218 results indicate that amino acid identity and hydrophobic character of the loop are important for  
219 proper TgPLP1 function.

220 **Discussion**

221 This paper provides new insight into the structure and function of APC $\beta$ , an  
222 apicomplexan specific membrane-binding domain associated with parasite egress and cell  
223 traversal. Previous studies established that the TgPLP1 CTD, which includes APC $\beta$ , has  
224 membrane-binding activity and is crucial for TgPLP1 function in egress.<sup>[16]</sup>; however, the lipid

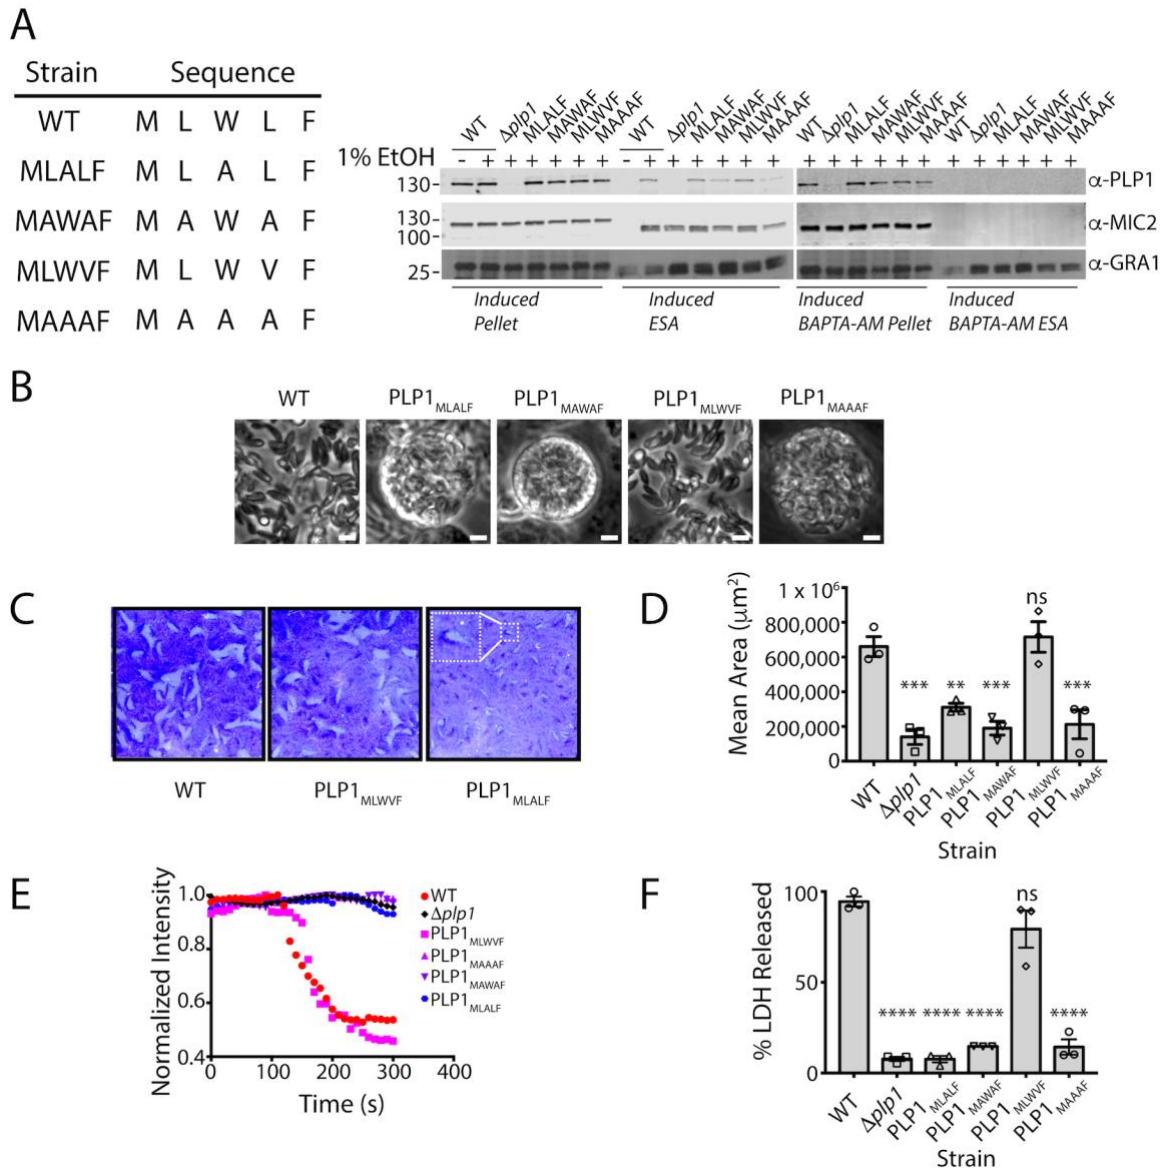

**Figure 6. Alanine substitution mutants mimic the deletion strain egress phenotype.** A. Representative western blot of an ESA assay of amino acid substitutions in the hydrophobic loop of *Tg*PLP1. The wild type sequence (MLWLF) was mutated to generate various amino acid substitution mutant strains. Strains are labeled with the generated amino acid sequence. Pellet fractions are comprised of parasites recovered after induction. ESA fractions include soluble proteins that have been secreted by the parasites. MIC2 and GRA1 serve as control for calcium-dependent and calcium-independent secretion, respectively. B. Phase contrast images of WT and mutant strains. Scale bar, 5  $\mu$ m. C. Representative images from triplicate plaque assays of WT,  $\Delta plp1$ , and hydrophobic loop amino acid substitution mutants. Inset shows an enlargement of a plaque for a small plaque mutant that exemplifies the other small plaque mutants. D. Quantification of plaque area from three biological replicate experiments. Statistical significance determined by one-way ANOVA with Dunnett correction. E. Fluorescence intensity tracings of DsRed escape from the PV. Infected monolayers were treated with 1  $\mu$ M cytochalasin D and 200  $\mu$ M zaprinast and observed by fluorescence microscopy. Data shown is representative of that from three biological replicates. F. Egress as measured by LDH release upon addition of 200  $\mu$ M zaprinast and incubation for 20 min. These data were collected simultaneously with the data shown in Figure 5E. Statistical significance determined by one-way ANOVA with Dunnett correction of three biological replicates.

225 binding specificity and structure of this domain remained unknown. The structure solved herein  
 226 is essentially identical to the *Tg*PLP1 APC $\beta$  domain reported recently by Ni et al. [17], but our  
 227 work additionally defines the lipid binding specificity, provides evidence for insertion of the

228 hydrophobic loop into membranes, and establishes a critical role for this loop in *TgPLP1*  
229 function during parasite egress.

230 We found that the *TgPLP1* CTD has a preference for binding IL phospholipids,  
231 particularly PS and PE, and that it fails to efficiently recognize OL phospholipids such as PC and  
232 SM. These results suggest a working model of directional activity wherein phospholipid  
233 accessibility enhances *TgPLP1* activity during egress and limits activity during subsequent  
234 invasion. In this model, micronemal secretion of *TgPLP1* during egress delivers it to the PVM  
235 for putative binding to PS and PE. Upon escape from the PV, additional secretion of *TgPLP1*  
236 targets PS and PE in the IL of the host plasma membrane to facilitate parasite exit from the  
237 infected cell. The model further posits that a lack of preferred phospholipid receptors on the OL  
238 of the target cell limits *TgPLP1* activity during invasion, thereby allowing formation of the PV.  
239 That *T. gondii* is capable of wounding host cells in a *TgPLP1*-dependent manner when  
240 microneme secretion and *TgPLP1* activity are enhanced in low pH medium supports this model.  
241 However, the leaflet-specific phospholipid composition of the PVM remains unknown. Although  
242 the initial topology of this membrane upon invasion is such that PE and PS would be exclusively  
243 in the cytosolic leaflet, reports have suggested extensive lipid remodeling of the PVM after  
244 invasion and during intracellular replication.<sup>[28, 29]</sup> Also, *T. gondii* is known to secrete into the  
245 PV a PS decarboxylase, which converts PS to PE, implying the presence of PS in the PVM<sup>[30]</sup>.  
246 We attempted to create transgenic *T. gondii* that secrete a PS binding probe (lactadherin C2-  
247 GFP) into the PV, but the protein is largely retained in the parasite endoplasmic reticulum. An  
248 additional limitation of the working model is that the extent to which *TgPLP1* acts upon the host  
249 plasma membrane during egress remains unknown. Nevertheless, other examples of directional  
250 activity exist including the predatory fungus *Pleurotus ostreatus* (Oyster mushroom), which  
251 targets nematodes by secreting pleurotolysin A/B, a two-component MACPF pore-forming toxin.  
252 The pleurotolysin A subunit requires SM and cholesterol for binding,<sup>[31-33]</sup> which is consistent  
253 with its action, together with the MACPF B subunit, on exposed membranes of the target  
254 nematode. Perforin-1 also exhibits directional activity, but its specificity for a target membrane is  
255 influenced by the spacing of phospholipids from unsaturation of acyl chains rather than by  
256 recognition of head groups.<sup>[34]</sup> Defining the phospholipid binding specificity and the role of acyl  
257 chain spacing for other MACPF proteins might reveal additional examples of leaflet preference  
258 consistent with a directional activity model.

259 Identifying molecular determinants of membrane recognition by apicomplexan PLPs is  
260 necessary to understand cytolytic parasite egress and cell traversal. To address this, we generated  
261 an expression construct of the *Tg*PLP1 CTD and solved the 1.13 Å resolution crystal structure of  
262 the APC $\beta$  domain. Despite using a full-length CTD expression construct the diffraction data only  
263 contains the APC $\beta$  domain and lacks the CTT. Whether the lack of density is due to flexibility in  
264 the CTT or enzymatic cleavage remains unclear. The *Tg*PLP1 APC $\beta$  structure presented here is an  
265 unusual double-layered  $\beta$ -prism with pseudo threefold symmetry. Analysis of the crystal  
266 structure shows a hydrophobic loop that protrudes from one of the subunits, which we  
267 interrogated for membrane insertion via fluorescence of a tryptophan located within the loop.  
268 The observed increase in intrinsic tryptophan fluorescence in the presence of liposomes is  
269 consistent with that seen for perfringolysin O and pneumolysin in the presence of liposomes.<sup>[35-  
270 37]</sup> The *Tg*PLP1 APC $\beta$  domain contains three other tryptophan side chains, but two are buried  
271 within the hydrophobic core and their spectra is likely unchanged by the addition of liposomes.  
272 The third tryptophan is surface exposed, but is located in between the inner and outer layer of the  
273 beta prism, a position that is unlikely to insert into a lipid bilayer. Thus, we conclude that the  
274 tryptophan located at the tip of the protruding hydrophobic loop is probably responsible for  
275 changes in the fluorescence spectra reported here. These results are consistent with recently  
276 published molecular dynamic simulations that theorize insertion of the protruding hydrophobic  
277 loop into the membrane.<sup>[17]</sup> Insertion of the hydrophobic loop into the target membrane might be  
278 required for *Tg*PLP1 to gain a strong foothold for the subsequent conformational rearrangements  
279 that accompany pore formation.

280 To further probe the extent to which the hydrophobic loop is important to *Tg*PLP1  
281 function we generated parasite lines that were genetically engineered to harbor mutations that  
282 probed the length of the hydrophobic loop as well as the importance of particular residues  
283 therein. Previous work has shown that *Tg*PLP1 is required for efficient lysis of the PVM and the  
284 subsequent egress from the host cell.<sup>[15]</sup> Additionally our previous work has also identified the  
285 *Tg*PLP1 CTD as being critical for function.<sup>[16]</sup> The results presented here show that mutations  
286 that affect the length and character of the hydrophobic loop recapitulate the egress defect seen  
287 with  $\Delta plp1$  parasites. Namely, these loop mutant strains form spheres in egressed cultures, form  
288 small plaques relative to wild type parasites, fail to permeabilize the PVM when motility is  
289 arrested, and have a delay in egress after induction. The most striking of these observations is the

290 single alanine substitution of the tryptophan located at the tip of the hydrophobic loop.  
291 Tryptophan often contributes to the binding interface of membrane binding proteins because of  
292 its properties as both a hydrophobic and polar molecule. Indeed, many MACPF/CDC proteins  
293 utilize tryptophan residues for binding target membranes<sup>[35, 38, 39]</sup> That a single tryptophan to  
294 alanine substitution recapitulates the egress defect observed in parasites lacking *TgPLP1*  
295 altogether underscores the importance of the hydrophobic loop for efficient egress. The extent to  
296 which a similarly important loop is conserved in other apicomplexan PLPs remains unknown in  
297 the absence of other structural studies.

298 The work presented here along with that of Ni et al <sup>[17]</sup> is a key first step in our  
299 understanding of how apicomplexan PLPs recognize and bind to membranes. *T. gondii* encodes  
300 two PLPs, *TgPLP1* and *TgPLP2*, but only *TgPLP1* has been shown to be important for cytolytic  
301 egress. *TgPLP2* is not expressed in the tachyzoite stage. A related apicomplexan parasite and  
302 causative agent of malaria, *Plasmodium spp.*, has a more complex life cycle and encodes an  
303 expanded family of five PLPs, *PPLP1-5*. <sup>[40-45]</sup> *Plasmodium* PLPs have been implicated in  
304 cytolytic egress as well as in cell traversal, a process required for migrating through tissue. <sup>[46-48]</sup>  
305 Despite some sequence similarity between the *T. gondii* and *Plasmodium spp.* PLPs (55%  
306 similarity between *TgPLP1* and *P. falciparum* PLP1) the molecular determinants that govern  
307 membrane recognition and binding by *Plasmodium* PLPs remain unclear. More thorough  
308 structural and functional studies on *Plasmodium* PLPs are needed to further our understanding of  
309 how apicomplexan PLPs recognize their target membranes and shed light on how these differing  
310 activities have evolved within a common protein scaffold.

311 Together with previous findings, the current work brings us closer to a molecular  
312 understanding of how *TgPLP1* facilitates parasite egress. The work also provides a foundation  
313 upon which future work on *TgPLP1* and other apicomplexan PLPs are expected to illuminate the  
314 molecular basis of differential function in egress and cell traversal.

315

**Table 1. Data collection and refinement statistics**

| <i>Data collection</i>             | <i>TgPLP1<sub>APCβ</sub> PDB code: 6D7A</i> |
|------------------------------------|---------------------------------------------|
| Resolution range                   | 24.88 - 1.13 (1.17 - 1.13)                  |
| Space group                        | C 1 2 1                                     |
| Unit cell                          |                                             |
| a, b, c (Å)                        | 101.98, 50.85, 105.34                       |
| α, β, γ (°)                        | 90, 90.13, 90                               |
| Total reflections                  | 851134 (10855)                              |
| Unique reflections                 | 183401 (14245)                              |
| Multiplicity                       | 4.6 (1.3)                                   |
| Completeness (%)                   | 94.92 (71.21)                               |
| Mean I/σ(I)                        | 7.99 (0.49)                                 |
| Wilson B-factor                    | 10.13                                       |
| R-merge                            | 0.07709 (1.266)                             |
| R-meas                             | 0.08447 (1.735)                             |
| R-pim                              | 0.03364 (1.179)                             |
| CC1/2                              | 0.997 (0.276)                               |
| CC*                                | 0.999 (0.658)                               |
| <b><i>Refinement</i></b>           |                                             |
| Reflections used in refinement     | 183401 (14245)                              |
| Reflections used for R-free        | 9505 (737)                                  |
| R-work                             | 0.1407 (0.3020)                             |
| R-free                             | 0.1636 (0.3008)                             |
| CC(work)                           | 0.968 (0.430)                               |
| CC(free)                           | 0.963 (0.441)                               |
| Number of non-hydrogen atoms       | 4778                                        |
| macromolecules                     | 4120                                        |
| ligands                            | 4                                           |
| solvent                            | 654                                         |
| Protein residues                   | 531                                         |
| RMS(bonds) (Å)                     | 0.009                                       |
| RMS(angles) (°)                    | 1.38                                        |
| Ramachandran favored (%)           | 97.15                                       |
| Ramachandran allowed (%)           | 2.85                                        |
| Ramachandran outliers (%)          | 0.00                                        |
| Rotamer outliers (%)               | 0.43                                        |
| Clash score                        | 2.08                                        |
| Average B-factor (Å <sup>2</sup> ) | 16.70                                       |
| Macromolecules (Å <sup>2</sup> )   | 14.44                                       |
| Ligands (Å <sup>2</sup> )          | 12.06                                       |
| Solvent (Å <sup>2</sup> )          | 30.99                                       |

Statistics for the highest resolution shell are shown in parentheses.

316

317



## 318 **Materials and Methods**

### 319 ***Liposome preparation***

320 Liposomes were prepared from 10 mg/mL stock solutions of 1-palmitoyl-2-oleoyl-*sn*-glycero-3-  
321 phosphocholine (POPC, Avanti), 1-palmitoyl-2-oleoyl-*sn*-glycero-3-[phospho-L-serine] (POPS,  
322 Avanti), L- $\alpha$ -phosphatidylethanolamine (POPE, Avanti), Sphingomyelin (SM, Avanti), L- $\alpha$ -  
323 phosphatidylinositol (PI, Avanti), and cholesterol (Avanti) in the ratios described in the figure  
324 captions. Two  $\mu$ mol total lipids were dried under a nitrogen stream. Dried lipids were incubated  
325 in 1 mL of rehydration buffer (100 mM NaCl, 1 mM CaCl<sub>2</sub>, 1 mM MgCl<sub>2</sub>, 50 mM Tris pH 7.4)  
326 for 30 min and subsequently vortexed until lipid film was completely dissolved. Hydrated lipid  
327 suspension was subjected to 3 freeze/thaw cycles, alternating between dry ice/ethanol bath and  
328 warm water bath. The rehydrated lipid solution was extruded through 400 nm pore-size filters  
329 using a mini-extruder (Avanti) to produce liposomes.

### 330 ***Membrane Flotation***

331 Two hundred nmol of liposomes were incubated with 0.5-1 nmol of recombinant proteins at  
332 37°C for 15 min in a final volume of 200  $\mu$ L. After incubation the reaction mixture was diluted  
333 with 1 mL 85% sucrose and layered with 2.8 mL of 65% sucrose and 1 mL of 10% sucrose. The  
334 reaction was centrifuged at 115,000g at 4°C for 16 h (Sorvall rotor AH-650). Fractions were  
335 collected and analyzed by western blot. Band intensity was quantified using Image J. The  
336 liposome binding efficiency was calculated as:

337

$$338 \quad \% \text{ Bound} = \frac{I_{\text{Bound}}}{I_{\text{Bound}} + I_{\text{Unbound}}} \times 100 \quad (1)$$

### 339 ***Protein Production & Purification***

340 High-five or Sf9 cells were expanded to six 1 L volumes. These were used to seed 20 L of media  
341 (Expression Systems) at  $2.0 \times 10^6$  cells/mL in a 36 L stir tank bioreactor. The culture was  
342 infected with recombinant baculovirus at a multiplicity of infection of 5. The reactor was  
343 incubated at 27°C with stirring and sparged with air for 72 h. The culture was pumped out and  
344 centrifuged at 1000g and 4°C for 40 min to pellet the cells. The media was collected, and batch  
345 bound with 0.5 mL per liter of Roche cComplete His-Tag purification resin for 4 h at 4°C with

346 stirring. Resin was loaded onto a column and washed with 50 mM Tris (pH 8.0), 300 mM NaCl  
347 and 20 mM imidazole. Protein was eluted with 50 mM Tris (pH 8.0), 300 mM NaCl and 250  
348 mM imidazole. Wash and elution fractions were collected and run on SDS page to determine  
349 purity and protein location. The poly-histidine tag was subsequently cleaved with TEV-protease  
350 at 4°C overnight and separated from the CTD by immobilized metal affinity chromatography.  
351 CTD fractions were further purified by anion exchange chromatography and concentrated to 22  
352 mg/mL.

### 353 *Crystallization & Data Acquisition*

354 *TgPLP1<sub>APCβ</sub>* crystals were obtained from the Molecular Dimensions Clear Strategy II screen set  
355 up with 1 μL of protein and 1 μL of reservoir containing 100 mM sodium cacodylate at pH 6.5,  
356 0.15 M KSCN, and 18% PEG 3350. Hanging drop plates were equilibrated at 20°C. The needle-  
357 like crystals were mounted on a cryoloop and transferred to a cryoprotectant solution containing  
358 the reservoir solution supplemented with 20% ethylene glycol. Native crystals were flash frozen  
359 in liquid nitrogen for data collection. For phase problem solution data sets, a two-hour soak was  
360 performed in a synthetic mother liquor supplemented with 20 mM KI and flash frozen in mother  
361 liquor supplemented with 20% ethylene glycol. Data sets were collected at LS-CAT beamline  
362 21ID-D and 21ID-G.

### 363 *Structure determination*

364 The crystals belonged to the  $C_{121}$  space group with cell dimensions of  $a = 101.98 \text{ \AA}$ ,  $b = 50.85 \text{ \AA}$ ,  
365  $c = 105.34 \text{ \AA}$ ,  $\alpha = 90^\circ$ ,  $\beta = 90.13^\circ$ , and  $\gamma = 90^\circ$ . Data reduction and scaling were performed with  
366 autoPROC.<sup>[49]</sup> Phasing was performed using the AutoSol in Phenix.<sup>[50]</sup> Initial solution was  
367 obtained by SAD on KI soaked crystals. The partial solution was then used as a molecular  
368 replacement model for the high-resolution data sets. Model building was performed in COOT<sup>[51]</sup>  
369 and refinement in PHENIX. The *TgPLP1<sub>APCβ</sub>* crystal structure was refined to a crystallographic  
370  $R_{\text{work}}$  of 14.07% and a  $R_{\text{free}}$  of 16.36% The final structure was analyzed with validation tools in  
371 MOLPROBITY. Structural visualization was performed via PyMOL.

### 372 *Fluorescence Measurements*

373 Intrinsic tryptophan emission intensity was measured on a Biotek Snergy H1 equipped with  
374 monochromators for both excitation and emission. The emission spectra were recorded between

375 320-400 nm with a step size of 5 nm. The excitation wavelength was set to 280 nm. The  
376 emission intensity was recorded in the absence and presence of PC, PC/PE, PC/PS liposomes and  
377 liposomes that had 10 mol% of the PC lipid replaced with 1-palmitoyl-2-stearoyl-7-doxy)-sn-  
378 glycerol-3-phosphocholine (7-Doxy) (Avanti).

### 379 ***Host cell and parasite culture***

380 All cells and parasites were maintained in a humidified incubator at 37°C and 5% CO<sub>2</sub>. Human  
381 foreskin fibroblast cells (HFF, ATCC CRL-1634) were maintained in Dulbecco's modified  
382 Eagle's medium (DMEM) supplemented with 10% Cosmic Calf serum, 20 mM HEPES pH 7.4,  
383 2 mM L-glutamine and 50 µg/mL penicillin/streptomycin. All *T. gondii* parasites were  
384 maintained by serial passaging in HFF cells and were routinely checked for mycoplasma  
385 contamination.

### 386 ***Parasite line generation***

387 PLP1 hydrophobic mutant strains were generated using CRISPR-Cas9 using RH $\Delta$ ku80 as a  
388 parental strain. 20 bp of *plp1*-specific guide RNA sequence targeting the hydrophobic loop was  
389 inserted into pCRISPR-Cas-9-Ble using site-directed mutagenesis to generate the pAG1 plasmid.  
390 An annealed synthetic oligonucleotide repair template pair that encoded the appropriate  
391 mutations and a silent mutation to replace the NGG cut site (IDTDNA) was mixed with pAG1  
392 and precipitated by addition of ethanol. Fifty million tachyzoites were transfected by  
393 electroporation in a 4 mm gap cuvette using a Bio-Rad Gene Pulser II with an exponential decay  
394 program set to 1500 V, 25 µF capacitance and no resistance and immediately added to a  
395 confluent HFF monolayer in a T25 flask. Parasites were selected with 50 µg/mL phleomycin 24  
396 h post transfection for 6 h and subsequently added to a confluent HFF monolayer in T25 flask.  
397 Parasites were incubated for 36-48 h. Clonal populations were isolated and a 1 kb fragment  
398 generated from extracted DNA was sequenced for confirmation of the correct mutation.

### 399 ***Excreted secreted antigen***

400 Induced excreted secreted antigens (ESA) were performed as previously described.<sup>[52]</sup> Briefly, 2  
401 x 10<sup>7</sup> parasites were incubated at 37°C for 2 min in 1.5 mL Eppendorf tubes with DMEM  
402 containing 10 mM HEPES, pH 7.4 and supplemented with 1% ethanol. Parasites were separated  
403 by centrifugation (1000g, 10 min, 4°C). Samples of the pellet and supernatant were run on a 10%

404 SDS-PAGE gel and analyzed by western blot. ESAs were performed in the presence and absence  
405 of 100  $\mu$ M BAPTA-AM.

#### 406 ***Immunofluorescence staining***

407 Infected monolayers were fixed with 4% formaldehyde for 20 min and washed with PBS. Slides  
408 were with 0.1% Triton X-100 for 10 min and blocked with 10% fetal bovine serum (FBS),  
409 0.01% Triton X-100 in PBS). Slides were subsequently incubated with rabbit anti-PLP1 (1:500)  
410 and mouse anti-MIC2 (6D10, 1:250) diluted in wash buffer (1% FBS, 1% Normal Goat Serum  
411 (NGS), 0.01% Triton X-100 in PBS) for 1 h at RT. After three washes, slides were incubated for  
412 1 h at RT with Alexa Fluor goat anti-rabbit and goat anti-mouse secondary antibodies (Invitrogen  
413 Molecular Probes) diluted in wash buffer (1:1000). Slides were washed and mounted in Mowiol  
414 prior to imaging.

#### 415 ***Plaque assay***

416 Infected monolayers of HFF cells in T25 flasks were washed with phosphate-buffered saline  
417 (PBS). Parasites were liberated by scraping the monolayer and passaging through a 27-gauge  
418 needle. Liberated parasites were filtered through a 3  $\mu$ m filter (Millipore) and counted on a  
419 hemocytometer. Monolayers of HFFs in individual 6-well plates were inoculated with 50  
420 parasites and incubated, undisturbed, for one week and fixed with 2% (w/v) crystal violet. Plaque  
421 size was quantified using ImageJ.

#### 422 ***PV permeabilization***

423 Monolayers were infected with tachyzoites expressing DsRed and allowed to replicate for 30 h.  
424 Infected monolayers were washed twice with warmed Ringer's buffer (155 mM NaCl, 3 mM  
425 KCl, 2 mM CaCl<sub>2</sub>, 1 mM MgCl<sub>2</sub>, 3 mM NaH<sub>2</sub>PO<sub>4</sub>, 10 mM HEPES, 10 mM Glucose, 1% FBS,  
426 pH 7.40). Ionophore treatment was initiated by addition of an equal volume of 2  $\mu$ M  
427 cytochalasin D and 400  $\mu$ M zaprinast. Fluorescence image time series were collected every 10  
428 sec for 5 min.

#### 429 ***LDH egress assay***

430 Infected monolayers of HFF cells in T25 flasks were washed with phosphate-buffered saline  
431 (PBS) and liberated by scraping the monolayer and passaging through a 27-gauge needle.

432 Liberated parasites were filtered through a 3  $\mu\text{m}$  filter (Millipore), counted on a hemocytometer,  
433 and centrifuged at 1000g for 10 min. Parasites were resuspended to a density of  $5 \times 10^5$   
434 parasites/mL and each well of a 96-well flat bottom culture plate was inoculated with  $5 \times 10^4$   
435 tachyzoites of the appropriate strain. Infected cells were washed with warm Ringer's buffer and  
436 treated with zaprinast diluted to 200  $\mu\text{M}$  in Ringer's buffer, Ringer's with an equal volume of  
437 dimethyl sulfoxide (DMSO), or cell lysis reagent (BioVision) diluted in Ringer's. Treated plates  
438 were incubated at 5%  $\text{CO}_2$  and  $37^\circ\text{C}$  for 20 min. Plates were placed on ice and 50  $\mu\text{l}$  of each well  
439 was transferred to a 96-well round-bottom plate. Round-bottom plates were centrifuged at 500g  
440 for 5 min. Ten  $\mu\text{l}$  of solution was tested for lactate dehydrogenase (LDH) following the  
441 manufacturer's protocol (Biovision).

#### 442 **Data availability**

443 The atomic coordinates are available at the Protein Data Bank (PDB) under accession number  
444 6D7A.

#### 445 **End Matter**

##### 446 *Author Contributions and Notes*

447 Lipid binding experiments were designed by OZ and VBC and performed by OZ. JDP and WCB  
448 expressed recombinant proteins and performed initial purification. CMEB purified recombinant  
449 proteins and crystallized  $Tg\text{PLP1}_{\text{APC}\beta}$ . Diffraction data was collected by CMEB, NMK, and ZW.  
450 The  $Tg\text{PLP1}_{\text{APC}\beta}$  structure was solved by NMK and refined by AJG. Tryptophan fluorescence  
451 and mutational analysis was designed by AJG and VBC and performed by AJG. Mutant  
452 characterization was performed by AJG and M-HH. AJG and VBC wrote the manuscript.

453

454 The authors declare no conflict of interest.

455 This article contains supporting information online.

##### 456 *Acknowledgments*

457 We thank Tracey Schultz for laboratory support and Aric Schultz for expertise and thoughtful  
458 discussions regarding *Toxoplasma* egress. We also thank Jingga Inlora, Vineela Chukkapalli,  
459 Dishari Mukhejee, Chris Sumner and Akira Ono for help with liposome preparation. We

460 gratefully acknowledge the funding support from the University of Michigan Departments of  
461 Chemistry and Biophysics and the U.S. National Institutes of Health (R01AI46675 to VBC).  
462 This research used resources of the Advanced Photon Source, a U.S. Department of Energy  
463 (DOE) Office of Science User Facility operated for the DOE Office of Science by Argonne  
464 National Laboratory under contract no. DE-AC02-06CH11357. Use of the LS-CAT Sector 21  
465 was supported by the Michigan Economic Development Corporation and the Michigan  
466 Technology Tri-Corridor (grant 085P1000817).

## 467 **References**

- 468 1. Stevens JM, Galyov EE, Stevens MP. (2006) Actin-dependent movement of bacterial  
469 pathogens. *Nat Rev Microbiol* 4(2): 91-101.  
470
- 471 2. Schaechter M, Bozeman FM, Smadel JE. (1957) Study on the growth of rickettsiae. II.  
472 morphologic observations of living rickettsiae in tissue culture cells. *Virology* 3(1): 160-  
473 172.  
474
- 475 3. Hybiske K, Stephens RS. (2007) Mechanisms of host cell exit by the intracellular bacterium  
476 chlamydia. *Proc Natl Acad Sci U S A* 104(27): 11430-11435.  
477
- 478 4. Alvarez M, Casadevall A. (2006) Phagosome extrusion and host-cell survival after  
479 cryptococcus neoformans phagocytosis by macrophages. *Curr Biol* 16(21): 2161-2165.  
480
- 481 5. Ma H, Croudace JE, Lammas DA, May RC. (2006) Expulsion of live pathogenic yeast by  
482 macrophages. *Curr Biol* 16(21): 2156-2160.  
483
- 484 6. Fink SL, Cookson BT. (2005) Apoptosis, pyroptosis, and necrosis: Mechanistic description  
485 of dead and dying eukaryotic cells. *Infect Immun* 73(4): 1907-1916.  
486
- 487 7. Deigendesch N, Costa Nunez J, Stenzel W. (2017) Parasitic and fungal infections. *Handb*  
488 *Clin Neurol* 145: 245-262.  
489
- 490 8. Van Den Steen PE, Deroost K, Geurts N, Heremans H, Van Damme J, et al. (2011) Malaria:  
491 Host-pathogen interactions, immunopathological complications and therapy. *Verh K Acad*  
492 *Geneeskd Belg* 73(1-2): 123-151.  
493
- 494 9. McDonald V. (2011) Cryptosporidiosis: Host immune responses and the prospects for  
495 effective immunotherapies. *Expert Rev Anti Infect Ther* 9(11): 1077-1086.  
496
- 497 10. Shirley MW, Smith AL, Blake DP. (2007) Challenges in the successful control of the avian  
498 coccidia. *Vaccine* 25(30): 5540-5547.  
499

- 500 11. Boothroyd JC. (2009) *Toxoplasma gondii*: 25 years and 25 major advances for the field. *Int*  
501 *J Parasitol* 39(8): 935-946.  
502
- 503 12. Singh S, Chitnis CE. (2012) Signalling mechanisms involved in apical organelle discharge  
504 during host cell invasion by apicomplexan parasites. *Microbes Infect* 14(10): 820-824.  
505
- 506 13. Keeley A, Soldati D. (2004) The glideosome: A molecular machine powering motility and  
507 host-cell invasion by apicomplexa. *Trends Cell Biol* 14(10): 528-532.  
508
- 509 14. Besteiro S, Dubremetz JF, Lebrun M. (2011) The moving junction of apicomplexan  
510 parasites: A key structure for invasion. *Cell Microbiol* 13(6): 797-805.  
511
- 512 15. Kafsack BF, Pena JD, Coppens I, Ravindran S, Boothroyd JC, et al. (2009) Rapid membrane  
513 disruption by a perforin-like protein facilitates parasite exit from host cells. *Science*  
514 323(5913): 530-533.  
515
- 516 16. Roiko MS, Carruthers VB. (2013) Functional dissection of *Toxoplasma gondii* perforin-like  
517 protein 1 reveals a dual domain mode of membrane binding for cytolysis and parasite egress.  
518 *J Biol Chem* 288(12): 8712-8725.  
519
- 520 17. Ni T, Williams SI, Rezelj S, Anderluh G, Harlos K, et al. (2018) Structures of monomeric  
521 and oligomeric forms of the *Toxoplasma gondii* perforin-like protein 1. *Sci Adv* .  
522
- 523 18. Dunstone MA, Tweten RK. (2012) Packing a punch: The mechanism of pore formation by  
524 cholesterol dependent cytolysins and membrane attack complex/perforin-like proteins. *Curr*  
525 *Opin Struct Biol* 22(3): 342-349.  
526
- 527 19. Law RH, Lukyanova N, Voskoboinik I, Caradoc-Davies TT, Baran K, et al. (2010) The  
528 structural basis for membrane binding and pore formation by lymphocyte perforin. *Nature* .  
529
- 530 20. Abrami L, Fivaz M, Glauser PE, Parton RG, van der Goot FG. (1998) A pore-forming toxin  
531 interacts with a GPI-anchored protein and causes vacuolation of the endoplasmic reticulum.  
532 *J Cell Biol* 140(3): 525-540.  
533
- 534 21. Giddings KS, Zhao J, Sims PJ, Tweten RK. (2004) Human CD59 is a receptor for the  
535 cholesterol-dependent cytolysin intermedilysin. *Nat Struct Mol Biol* 11(12): 1173-1178.  
536
- 537 22. Lawrence SL, Gorman MA, Feil SC, Mulhern TD, Kuiper MJ, et al. (2016) Structural basis  
538 for receptor recognition by the human CD59-responsive cholesterol-dependent cytolysins.  
539 *Structure* 24(9): 1488-1498.  
540
- 541 23. Hotze EM, Tweten RK. (2012) Membrane assembly of the cholesterol-dependent cytolysin  
542 pore complex. *Biochim Biophys Acta* 1818(4): 1028-1038.  
543
- 544 24. Bakrac B, Gutierrez-Aguirre I, Podlesek Z, Sonnen AF, Gilbert RJ, et al. (2008) Molecular  
545 determinants of sphingomyelin specificity of a eukaryotic pore-forming toxin. *J Biol Chem*

- 546 283(27): 18665-18677.  
547  
548 25. De Colibus L, Sonnen AF, Morris KJ, Siebert CA, Abrusci P, et al. (2012) Structures of  
549 lysenin reveal a shared evolutionary origin for pore-forming proteins and its mode of  
550 sphingomyelin recognition. *Structure* 20(9): 1498-1507.  
551  
552 26. Yamaji A, Sekizawa Y, Emoto K, Sakuraba H, Inoue K, et al. (1998) Lysin, a novel  
553 sphingomyelin-specific binding protein. *J Biol Chem* 273(9): 5300-5306.  
554  
555 27. Holm L, Laakso LM. (2016) Dali server update. *Nucleic Acids Res* 44(W1): W351-5.  
556  
557 28. Caffaro CE, Boothroyd JC. (2011) Evidence for host cells as the major contributor of lipids  
558 in the intravacuolar network of toxoplasma-infected cells. *Eukaryot Cell* 10(8): 1095-1099.  
559  
560 29. Pavlou G, Biesaga M, Touquet B, Lagal V, Balland M, et al. (2018) Toxoplasma parasite  
561 twisting motion mechanically induces host cell membrane fission to complete invasion  
562 within a protective vacuole. *Cell Host Microbe* 24(1): 81-96.e5.  
563  
564 30. Gupta N, Hartmann A, Lucius R, Voelker DR. (2012) The obligate intracellular parasite  
565 toxoplasma gondii secretes a soluble phosphatidylserine decarboxylase. *J Biol Chem*  
566 287(27): 22938-22947.  
567  
568 31. Bernheimer AW, Avigad LS. (1979) A cytolytic protein from the edible mushroom,  
569 pleurotus ostreatus. *Biochim Biophys Acta* 585(3): 451-461.  
570  
571 32. Tomita T, Noguchi K, Mimuro H, Ukaji F, Ito K, et al. (2004) Pleurotolysin, a novel  
572 sphingomyelin-specific two-component cytolysin from the edible mushroom pleurotus  
573 ostreatus, assembles into a transmembrane pore complex. *J Biol Chem* 279(26): 26975-  
574 26982.  
575  
576 33. Ota K, Leonardi A, Mikelj M, Skocaj M, Wohlschlager T, et al. (2013) Membrane  
577 cholesterol and sphingomyelin, and ostreolysin A are obligatory for pore-formation by a  
578 MACPF/CDC-like pore-forming protein, pleurotolysin B. *Biochimie* 95(10): 1855-1864.  
579  
580 34. Antia R, Schlegel RA, Williamson P. (1992) Binding of perforin to membranes is sensitive  
581 to lipid spacing and not headgroup. *Immunol Lett* 32(2): 153-157.  
582  
583 35. Soltani CE, Hotze EM, Johnson AE, Tweten RK. (2007) Structural elements of the  
584 cholesterol-dependent cytolysins that are responsible for their cholesterol-sensitive  
585 membrane interactions. *Proc Natl Acad Sci U S A* 104(51): 20226-20231.  
586  
587 36. Nakamura M, Sekino N, Iwamoto M, Ohno-Iwashita Y. (1995) Interaction of theta-toxin  
588 (perfringolysin O), a cholesterol-binding cytolysin, with liposomal membranes: Change in  
589 the aromatic side chains upon binding and insertion. *Biochemistry* 34(19): 6513-6520.  
590



- 591 37. Heuck AP, Hotze EM, Tweten RK, Johnson AE. (2000) Mechanism of membrane insertion  
592 of a multimeric beta-barrel protein: Perfringolysin O creates a pore using ordered and  
593 coupled conformational changes. *Mol Cell* 6(5): 1233-1242.  
594
- 595 38. van Pee K, Neuhaus A, D'Imprima E, Mills DJ, Kuhlbrandt W, et al. (2017) CryoEM  
596 structures of membrane pore and prepore complex reveal cytolytic mechanism of  
597 pneumolysin. *Elife* 6: 10.7554/eLife.23644.  
598
- 599 39. Johnson S, Brooks NJ, Smith RA, Lea SM, Bubeck D. (2013) Structural basis for  
600 recognition of the pore-forming toxin intermedilysin by human complement receptor CD59.  
601 *Cell Rep* 3(5): 1369-1377.  
602
- 603 40. Ishino T, Chinzei Y, Yuda M. (2005) A plasmodium sporozoite protein with a membrane  
604 attack complex domain is required for breaching the liver sinusoidal cell layer prior to  
605 hepatocyte infection. *Cell Microbiol* 7(2): 199-208.  
606
- 607 41. Deligianni E, Morgan RN, Bertuccini L, Wirth CC, Silmon de Monerri NC, et al. (2013) A  
608 perforin-like protein mediates disruption of the erythrocyte membrane during egress of  
609 plasmodium berghei male gametocytes. *Cell Microbiol* .  
610
- 611 42. Wirth CC, Glushakova S, Scheuermayer M, Repnik U, Garg S, et al. (2014) Perforin-like  
612 protein PPLP2 permeabilizes the red blood cell membrane during egress of plasmodium  
613 falciparum gametocytes. *Cell Microbiol* 16(5): 709-733.  
614
- 615 43. Kadota K, Ishino T, Matsuyama T, Chinzei Y, Yuda M. (2004) Essential role of membrane-  
616 attack protein in malarial transmission to mosquito host. *Proc Natl Acad Sci U S A* 101(46):  
617 16310-16315.  
618
- 619 44. Wirth CC, Bennink S, Scheuermayer M, Fischer R, Pradel G. (2015) Perforin-like protein  
620 PPLP4 is crucial for mosquito midgut infection by plasmodium falciparum. *Mol Biochem*  
621 *Parasitol* 201(2): 90-99.  
622
- 623 45. Ecker A, Bushell ES, Tewari R, Sinden RE. (2008) Reverse genetics screen identifies six  
624 proteins important for malaria development in the mosquito. *Mol Microbiol* 70(1): 209-220.  
625
- 626 46. Yang AS, Boddey JA. (2017) Molecular mechanisms of host cell traversal by malaria  
627 sporozoites. *Int J Parasitol* 47(2-3): 129-136.  
628
- 629 47. Yang AS, O'Neill MT, Jennison C, Lopaticki S, Allison CC, et al. (2017) Cell traversal  
630 activity is important for plasmodium falciparum liver infection in humanized mice. *Cell Rep*  
631 18(13): 3105-3116.  
632
- 633 48. Amino R, Giovannini D, Thiberge S, Gueirard P, Boisson B, et al. (2008) Host cell traversal  
634 is important for progression of the malaria parasite through the dermis to the liver. *Cell Host*  
635 *Microbe* 3(2): 88-96.  
636

- 637 49. Vonrhein C, Flensburg C, Keller P, Sharff A, Smart O, et al. (2011) Data processing and  
638 analysis with the autoPROC toolbox. *Acta Crystallogr D Biol Crystallogr* 67(Pt 4): 293-302.  
639
- 640 50. Adams PD, Afonine PV, Bunkoczi G, Chen VB, Davis IW, et al. (2010) PHENIX: A  
641 comprehensive python-based system for macromolecular structure solution. *Acta*  
642 *Crystallogr D Biol Crystallogr* 66(Pt 2): 213-221.  
643
- 644 51. Emsley P, Cowtan K. (2004) Coot: Model-building tools for molecular graphics. *Acta*  
645 *Crystallogr D Biol Crystallogr* 60(Pt 12 Pt 1): 2126-2132.  
646
- 647 52. Huynh MH, Boulanger MJ, Carruthers VB. (2014) A conserved apicomplexan microneme  
648 protein contributes to toxoplasma gondii invasion and virulence. *Infect Immun* 82(10):  
649 4358-4368.  
650  
651

652 **Supplementary Figures & Tables**

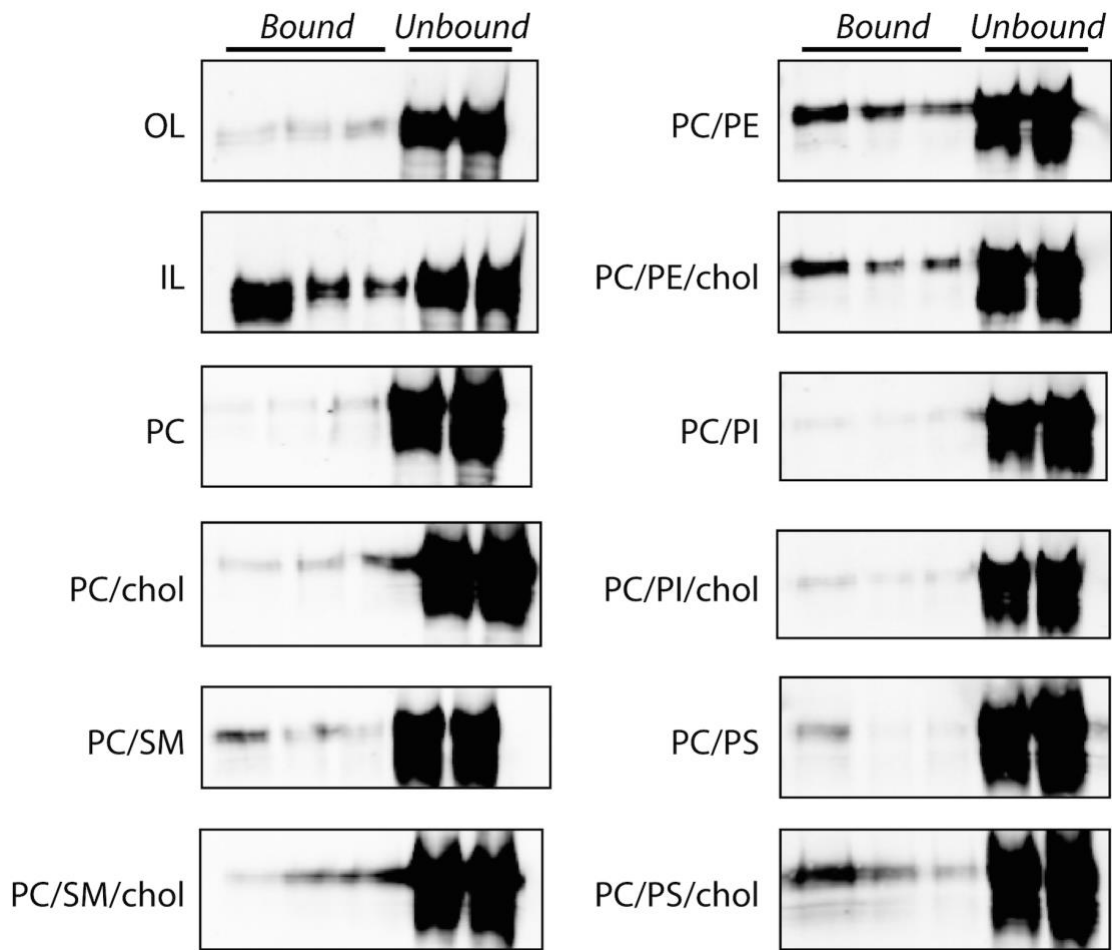

**Figure S1. TgPLP1<sub>CTD</sub> binding to liposomes of varying composition.** Representative western blots of liposome membrane flotation assays. Liposome composition as follows: OL: 75% PC, 8.3% SM, 16.7% cholesterol; IL: 35.7% PE, 14.3% PS, 21.4% PI, 28.6% cholesterol; PC: 100% PC; PC/chol: 50% PC, 50% cholesterol; PC/SM: 50% PC, 50% SM; PC/SM/chol: 30% PC, 50% SM, 20% cholesterol; PC/PE: 50% PC, 50% PE; PC/PE/chol: 30% PC, 50% PE, 20% cholesterol; PC/PS: : 50% PC, 50% PS; PC/PS/chol: 30% PC, 50% PS, 20% cholesterol; PC/PI: : 50% PC, 50% PI; PC/PI/chol: 30% PC, 50% PI, 20% cholesterol. Quantification of these bands is shown in Figure 1D.

653

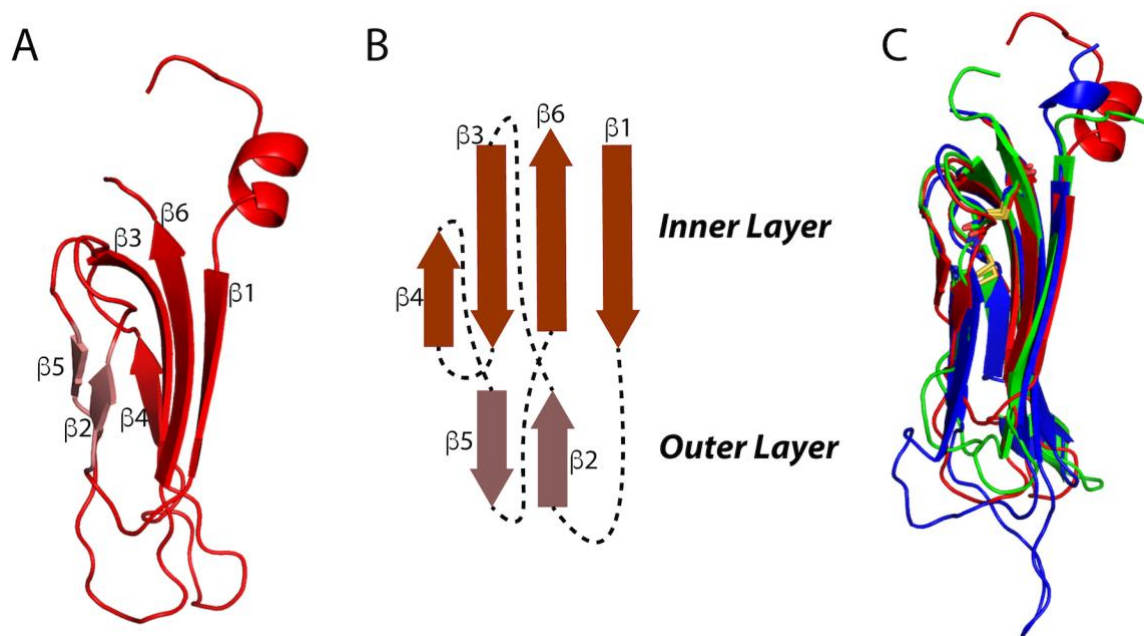

**Figure S2. Structural details of the *TgPLP1* APC $\beta$  structure.** A. Subdomain 1 of the *TgPLP1*<sub>APC $\beta$</sub>  crystal structure. Each subdomain is made up of an inner  $\beta$ -sheet of four anti-parallel strands and an outer  $\beta$ -sheet of two anti-parallel strands. B. Schematic representation of the inner and outer  $\beta$ -sheets. C. Overlay of the three subdomains of the APC $\beta$  crystal structure.

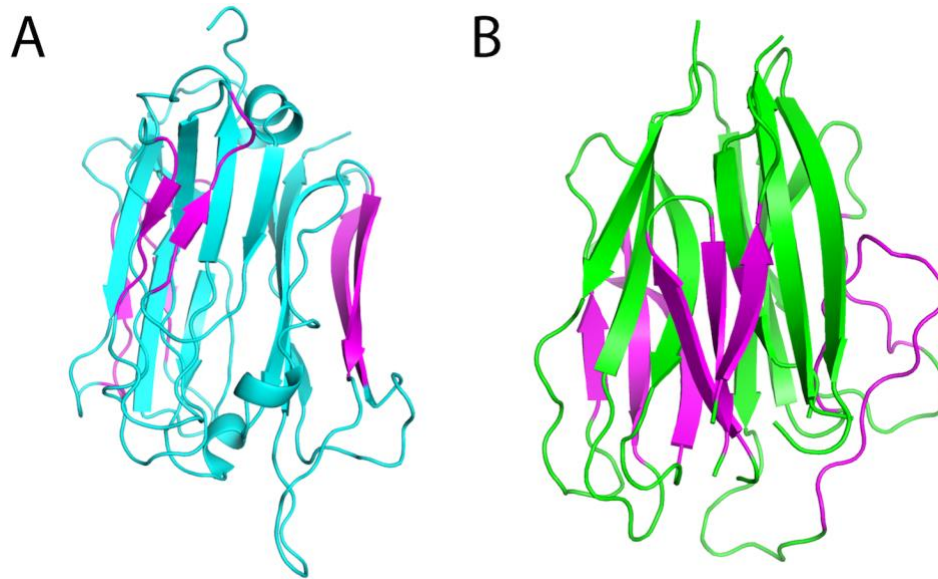

**Figure S3. Comparison of the *Tg*PLP1 APC $\beta$  crystal structure and the PCSK9 V-domain crystal structure** A. Cartoon representation of *Tg*PLP1 APC $\beta$  structure. B. Cartoon representation of the PCSK9 V-domain.

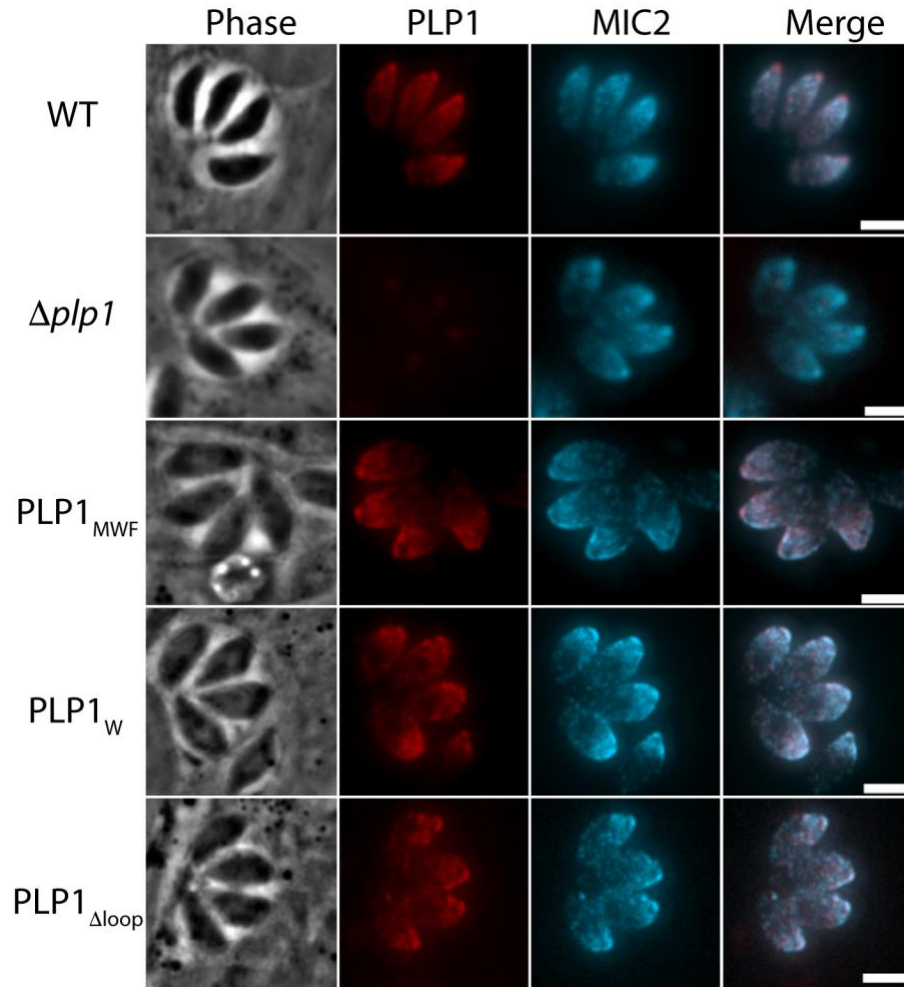

Figure S4. Indirect immunofluorescence of intracellular parasites with mouse anti-*TgMIC2* (cyan) and rabbit anti-*TgPLP1* (red) antibodies.

656

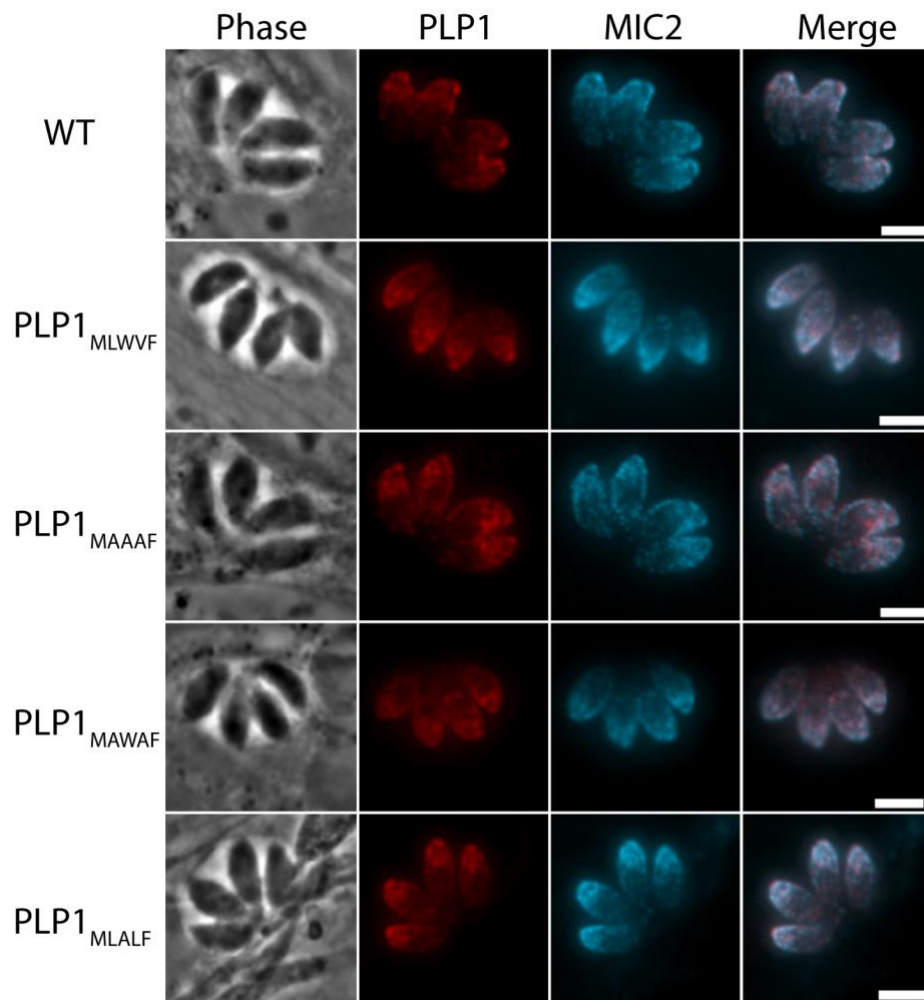

Figure S5. Indirect immunofluorescence of intracellular parasites with mouse anti-*TgMIC2* (cyan) and rabbit anti-*TgPLP1* (red) antibodies.

657

**Table S1. Dali server search results for PDB entry 6D7A**

| Number | PDB-chain | Dali-Z | % ID | Molecule Description                          |
|--------|-----------|--------|------|-----------------------------------------------|
| 1      | 5ouo-A    | 48.5   | 100  | Perforin-like protein 1                       |
| 2      | 5vlp-A    | 6.0    | 17   | Proprotein convertase subtilisin/kexin type 9 |
| 3      | 5a3k-A    | 3.9    | 10   | Putative pteridine-dependent dioxygenase      |

658

659
